# Supplementary material for: Nanoconjugation of PSMA-Targeting Ligands Enhances Perinuclear Localization and Improves Efficacy of Delivered Alpha-Particle Emitters against Tumor Endothelial Analogues
Source: Oxford University Press journal article supplement (doi:10.1158/1535-7163.mct-15-0207), 2015-12-31
Supplement: 15357163mct150207-sup-146597_1_supp_3125353_ntywxy.docx [file 15357163mct150207-sup-146597_1_supp_3125353_ntywxy.docx]

**Figure S2**

The dissociation constant (KD) was evaluated for the PSMA-targeting Ab-labeled vesicles (A), the urea-labeled vesicles (B), and the PSMA-targeting Ab (C). For vesicle constructs, the x-axis corresponds to the concentration of phospholipids. Error bars correspond to standard deviations of repeated measurements (2 and 3 independent preparations for antibodies and vesicles, respectively, 2 measurements per preparation).
