# Supplementary material for: Nanoconjugation of PSMA-Targeting Ligands Enhances Perinuclear Localization and Improves Efficacy of Delivered Alpha-Particle Emitters against Tumor Endothelial Analogues
Source: Oxford University Press journal article supplement (doi:10.1158/1535-7163.mct-15-0207), 2015-12-31
Supplement: 15357163mct150207-sup-146597_1_supp_3125355_ntyjxy.docx [file 15357163mct150207-sup-146597_1_supp_3125355_ntyjxy.docx]

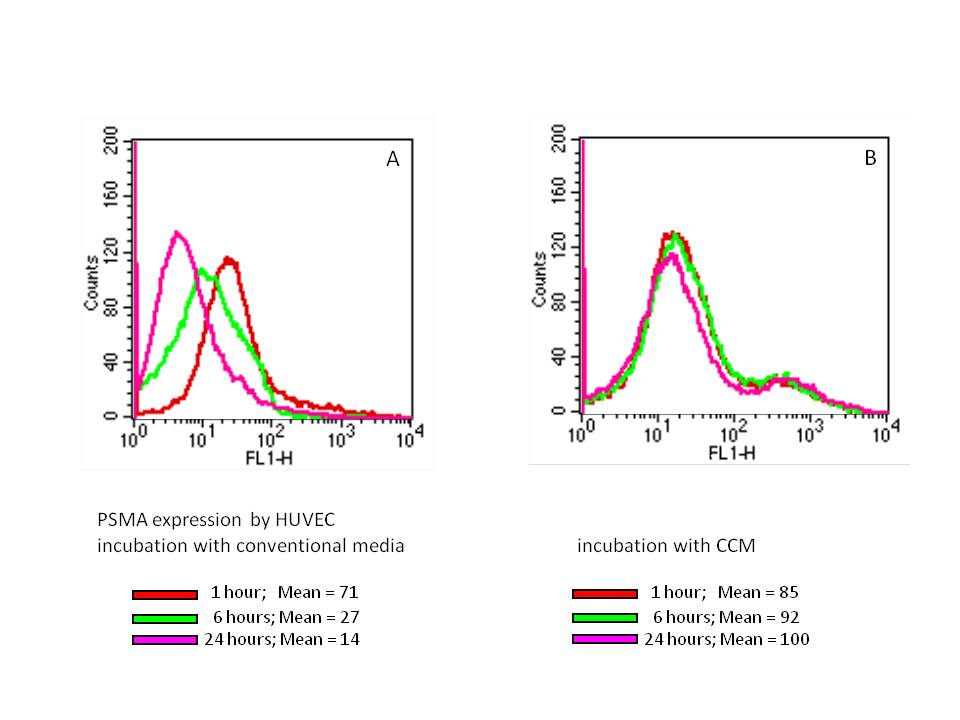


**Figure S4**

Upon removal of cell conditioned media (CCM) from HUVEC (A), PSMA expression decreases over time. All reported studies are conducted in the presence of CCM to ensure constant PSMA expression by HUVEC (B).
