# Supplementary material for: Nanoconjugation of PSMA-Targeting Ligands Enhances Perinuclear Localization and Improves Efficacy of Delivered Alpha-Particle Emitters against Tumor Endothelial Analogues
Source: Oxford University Press journal article supplement (doi:10.1158/1535-7163.mct-15-0207), 2015-12-31
Supplement: 15357163mct150207-sup-146597_1_supp_3127692_nq0jq1.docx [file 15357163mct150207-sup-146597_1_supp_3127692_nq0jq1.docx]

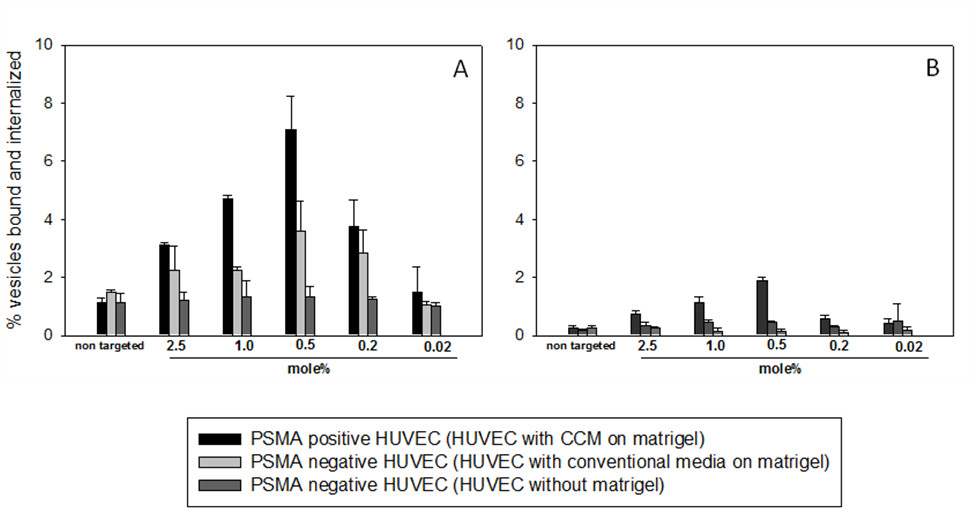


**Figure S1_A and S1_B**

Extent of lipid vesicles bound (A) and internalized (B) by PSMA+ HUVEC depends on the surface grafting density of the urea-based PSMA targeting ligand. In our studies, the fraction of 0.5 mole% of urea-based ligand is included in all lipid vesicle preparations. Error bars correspond to standard deviations of repeated measurements (3 independent construct preparations, 2 measurements per preparation).

**Figure S1_C**

Molecular structure of the non active lipid construct (top) and of the active urea-based targeting ligand (bottom).
